# Supplementary material
Source: ML conference proceedings conference paper supplement (https://proceedings.neurips.cc/paper_files/paper/2020/hash/5dbc8390f17e019d300d5a162c3ce3bc-Abstract.html)
Supplement: Supplementary file [file 5dbc8390f17e019d300d5a162c3ce3bc-Supplemental.pdf]

---

# From Finite to Countable-Armed Bandits: Appendix

---

Anand Kalvit<sup>1</sup> and Assaf Zeevi<sup>2</sup>  
Graduate School of Business  
Columbia University  
New York, USA  
{<sup>1</sup>akalvit22,<sup>2</sup>assaf}@gsb.columbia.edu

## A Proof of Theorem 1

Since the horizon of play is fixed at  $n$ , the decision maker may play at most  $n$  distinct arms. Therefore, it suffices to focus only on the sequence of the first  $n$  arms that may be played. A *realization* of an instance  $\nu = (\mathcal{G}(\mu_1), \mathcal{G}(\mu_2))$  is defined as the  $n$ -tuple  $r \equiv (r_i)_{1 \leq i \leq n}$ , where  $r_i \in \mathcal{G}(\mu_1) \cup \mathcal{G}(\mu_2)$  indicates the reward distribution of arm  $i \in \{1, 2, \dots, n\}$ . It must be noted that the decision maker need not play every arm in  $r$ . The distribution over the possible realizations of  $\nu = (\mathcal{G}(\mu_1), \mathcal{G}(\mu_2))$  in  $\{r : r_i \in \mathcal{G}(\mu_1) \cup \mathcal{G}(\mu_2), 1 \leq i \leq n\}$  satisfies  $\mathbb{P}(r_i \in \mathcal{G}(\max(\mu_1, \mu_2))) = \alpha$  for all  $i \in \{1, 2, \dots, n\}$ .

Recall that the cumulative pseudo-regret after  $n$  plays of a policy  $\pi$  on  $\nu = (\mathcal{G}(\mu_1), \mathcal{G}(\mu_2))$  is given by  $R_n^\pi(\nu) = \sum_{m=1}^n (\max(\mu_1, \mu_2) - \mu_{t(\pi_m)})$ , where  $t(\pi_m) \in \{1, 2\}$  indicates the type of the arm played by  $\pi$  at time  $m$ . Our goal is to lower bound  $\mathbb{E}R_n^\pi(\nu)$ , where the expectation is w.r.t. the randomness in  $\pi$  as well as the distribution over the possible realizations of  $\nu$ . To this end, we define the notion of expected cumulative regret of  $\pi$  on a realization  $r$  of  $\nu = (\mathcal{G}(\mu_1), \mathcal{G}(\mu_2))$  by

$$S_n^\pi(\nu, r) := \mathbb{E}^\pi \left[ \sum_{m=1}^n (\max(\mu_1, \mu_2) - \mu_{t(\pi_m)}) \right],$$

where the expectation  $\mathbb{E}^\pi$  is w.r.t. the randomness in  $\pi$ . Note that  $\mathbb{E}R_n^\pi(\nu) = \mathbb{E}^\nu S_n^\pi(\nu, r)$ , where the expectation  $\mathbb{E}^\nu$  is w.r.t. the distribution over the possible realizations of  $\nu$ . We define our problem class  $\mathcal{N}_\Delta$  as the collection of  $\Delta$ -separated instances given by

$$\mathcal{N}_\Delta := \{(\mathcal{G}(\mu_1), \mathcal{G}(\mu_2)) : \mu_1 - \mu_2 = \Delta, (\mu_1, \mu_2) \in \mathbb{R}^2\}.$$

**Definition 1 (Consistent policy)** Let  $\Lambda(r)$  denote the number of “optimal” arms in realization  $r$ . We call  $\pi$ , an asymptotically consistent policy for the problem class  $\mathcal{N}_\Delta$  if for any instance  $\nu \in \mathcal{N}_\Delta$  and any realization  $r$  thereof, it satisfies the following two conditions:

$$\mathbb{E}R_n^\pi(\nu) = o(n^p) \quad \text{for every } p \in (0, 1), \alpha \in (0, 1]. \quad (1)$$

$$\mathbb{E}^\nu [S_n^\pi(\nu, r) | \Lambda(r) = m] \geq \mathbb{E}^\nu [S_n^\pi(\nu, r) | \Lambda(r) = k] \quad \forall (m, n, k) : 0 \leq m \leq k \leq n. \quad (2)$$

The set of such policies is denoted by  $\Pi_{\text{cons}}(\mathcal{N}_\Delta)$ . Notice that (1), barring the condition on  $\alpha$ , is the standard definition of asymptotic consistency first introduced in [6] and subsequently adopted by many other papers. The exclusion of  $\alpha = 0$  is necessary since no policy can achieve sublinear regret in said case. We also remark that the additional condition in (2) is not restrictive since any reasonable policy is expected to incur a larger cumulative regret (in expectation) on realizations with fewer optimal arms.

Fix an arbitrary  $\Delta > 0$  and consider an instance  $\nu = (\{Q_1\}, \{Q_2\}) \in \mathcal{N}_\Delta$ , where  $(Q_1, Q_2)$  are unit-variance Gaussian distributions with means  $(\mu_1, \mu_2)$  respectively. Consider an arbitrary realization  $r \in \{Q_1, Q_2\}^n$  of  $\nu$  and let  $\mathcal{I} \subseteq \{1, 2, \dots, n\}$  denote the set of inferior arms in  $r$  (arms with reward distribution  $Q_2$ ). Consider another instance  $\nu' \in \mathcal{N}_\Delta$  given by  $\nu' = (\{\tilde{Q}_1\}, \{Q_1\})$ , where  $\tilde{Q}_1$  is

another unit variance Gaussian with mean  $\mu_1 + \Delta$ . Now consider a realization  $r' \in \{\tilde{Q}_1, Q_1\}^n$  of  $\nu'$  that is such that the arms at positions in  $\mathcal{I}$  have distribution  $\tilde{Q}_1$  while those at positions in  $\{1, 2, \dots, n\} \setminus \mathcal{I}$  have distribution  $Q_1$ . Notice that  $\mathcal{I}$  is the set of optimal arms in  $r'$  (arms with reward distribution  $\tilde{Q}_1$ ), implying  $\Lambda(r') = |\mathcal{I}|$ . Then, the following always holds:

$$S_n^\pi(\nu, r) + S_n^\pi(\nu', r') \geq \left(\frac{\Delta n}{2}\right) \left( \mathbb{P}_{\nu, r}^\pi \left( \sum_{i \in \mathcal{I}} N_i(n) > \frac{n}{2} \right) + \mathbb{P}_{\nu', r'}^\pi \left( \sum_{i \in \mathcal{I}} N_i(n) \leq \frac{n}{2} \right) \right),$$

where  $\mathbb{P}_{\nu, r}^\pi(\cdot)$  and  $\mathbb{P}_{\nu', r'}^\pi(\cdot)$  denote the probability measures w.r.t. the instance-realization pairs  $(\nu, r)$  and  $(\nu', r')$  respectively, and  $N_i(n)$  denotes the number of plays up to and including time  $n$  of arm  $i \in \{1, 2, \dots, n\}$ . Using the Bretagnolle-Huber inequality (Theorem 14.2 of [7]), we obtain

$$S_n^\pi(\nu, r) + S_n^\pi(\nu', r') \geq \left(\frac{\Delta n}{4}\right) \exp(-D(\mathbb{P}_{\nu, r}^\pi, \mathbb{P}_{\nu', r'}^\pi)),$$

where  $D(\mathbb{P}_{\nu, r}^\pi, \mathbb{P}_{\nu', r'}^\pi)$  denotes the KL-Divergence between  $\mathbb{P}_{\nu, r}^\pi$  and  $\mathbb{P}_{\nu', r'}^\pi$ . Using Divergence decomposition (Lemma 15.1 of [7]), we further obtain

$$S_n^\pi(\nu, r) + S_n^\pi(\nu', r') \geq \left(\frac{\Delta n}{4}\right) \exp\left(-\left(\frac{D(Q_2, \tilde{Q}_1)}{\Delta}\right) S_n^\pi(\nu, r)\right) = \left(\frac{\Delta n}{4}\right) \exp(-2\Delta S_n^\pi(\nu, r)),$$

where the equality follows since  $\tilde{Q}_1$  and  $Q_2$  are unit variance Gaussian distributions with means separated by  $2\Delta$ . Next, taking the expectation  $\mathbb{E}^\nu$  on both the sides above and a direct application of Jensen's inequality thereafter yields

$$\mathbb{E} R_n^\pi(\nu) + \mathbb{E}^\nu S_n^\pi(\nu', r') \geq \left(\frac{\Delta n}{4}\right) \exp(-2\Delta \mathbb{E} R_n^\pi(\nu)). \quad (3)$$

Consider the  $\mathbb{E}^\nu S_n^\pi(\nu', r')$  term in (3) and an arbitrary  $\alpha \in (0, 1/2]$ . Using a simple change-of-measure argument, we obtain

$$\begin{aligned} \mathbb{E}^\nu S_n^\pi(\nu', r') &= \mathbb{E}^{\nu'} \left[ S_n^\pi(\nu', r') \left(\frac{1-\alpha}{\alpha}\right)^{2(\Lambda(r')-n/2)} \right] \\ &\leq \mathbb{E} R_n^\pi(\nu') + \mathbb{E}^{\nu'} \left[ S_n^\pi(\nu', r') \left(\frac{1-\alpha}{\alpha}\right)^{2(\Lambda(r')-n/2)} \mathbb{1}\{\Lambda(r') > n/2\} \right], \end{aligned} \quad (4)$$

where the inequality follows since  $\alpha \leq 1/2$ . Now consider the second term on the RHS in (4). It follows that

$$\begin{aligned} &\mathbb{E}^{\nu'} \left[ S_n^\pi(\nu', r') \left(\frac{1-\alpha}{\alpha}\right)^{2(\Lambda(r')-n/2)} \mathbb{1}\{\Lambda(r') > n/2\} \right] \\ &= \sum_{k > n/2} \mathbb{E}^{\nu'} \left[ S_n^\pi(\nu', r') \left(\frac{1-\alpha}{\alpha}\right)^{2(\Lambda(r')-n/2)} \mathbb{1}\{\Lambda(r') = k\} \right] \\ &= \sum_{k > n/2} \left(\frac{1-\alpha}{\alpha}\right)^{(2k-n)} \mathbb{E}^{\nu'} [S_n^\pi(\nu', r') \mathbb{1}\{\Lambda(r') = k\}] \\ &= \sum_{k > n/2} \left(\frac{1-\alpha}{\alpha}\right)^{(2k-n)} \mathbb{E}^{\nu'} [S_n^\pi(\nu', r') | \Lambda(r') = k] \mathbb{P}_{\nu'}(\Lambda(r') = k) \\ &= \sum_{k > n/2} \left(\frac{1-\alpha}{\alpha}\right)^{(2k-n)} \mathbb{E}^{\nu'} [S_n^\pi(\nu', r') | \Lambda(r') = k] \binom{n}{k} \alpha^k (1-\alpha)^{(n-k)} \\ &= \alpha^n \sum_{k > n/2} \binom{n}{k} \left(\frac{1-\alpha}{\alpha}\right)^k \mathbb{E}^{\nu'} [S_n^\pi(\nu', r') | \Lambda(r') = k]. \end{aligned} \quad (5)$$

Recall that  $\nu' \in \mathcal{N}_\Delta$  and  $\pi \in \Pi_{\text{cons}}(\mathcal{N}_\Delta)$ . We have

$$\begin{aligned} \mathbb{E}R_n^\pi(\nu') &= \mathbb{E}^{\nu'} S_n^\pi(\nu', r') \\ &\geq \sum_{m=1}^k \mathbb{E}^{\nu'} [S_n^\pi(\nu', r') | \Lambda(r') = m] \mathbb{P}_{\nu'}(\Lambda(r') = m) \quad (\text{for any } k \leq n) \\ &\geq \mathbb{E}^{\nu'} [S_n^\pi(\nu', r') | \Lambda(r') = k] \mathbb{P}_{\nu'}(\Lambda(r') \leq k). \end{aligned} \quad (\text{using (2)}) \quad (6)$$

Since  $\alpha \leq 1/2$ , it follows that for any  $k > n/2$ ,  $\mathbb{P}_{\nu'}(\Lambda(r') \leq k) = \mathcal{O}_n(1)$  (the subscript  $n$  indicates that the asymptotic scaling is w.r.t.  $n$ ). Using this observation together with (1) and (6), we conclude that

$$\forall k > n/2, \alpha \in (0, 1/2] \text{ and every } p \in (0, 1), \mathbb{E}^{\nu'} [S_n^\pi(\nu', r') | \Lambda(r') = k] = o(n^p). \quad (7)$$

Combining (4), (5), (7) and using the fact that  $\nu' \in \mathcal{N}_\Delta$  with  $\pi \in \Pi_{\text{cons}}(\mathcal{N}_\Delta)$ , we conclude

$$\forall k > n/2, \alpha \in (0, 1/2] \text{ and every } p \in (0, 1), \mathbb{E}^{\nu'} S_n^\pi(\nu', r') = o(n^p). \quad (8)$$

Now consider (3). Taking the natural logarithm of both sides and rearranging, we obtain

$$\frac{\mathbb{E}R_n^\pi(\nu)}{\log n} \geq \left( \frac{1}{2\Delta} \right) \left( 1 + \frac{\log(\frac{\Delta}{4})}{\log n} - \frac{\log(\mathbb{E}R_n^\pi(\nu) + \mathbb{E}^{\nu'} S_n^\pi(\nu', r'))}{\log n} \right).$$

Since  $\nu, \nu' \in \mathcal{N}_\Delta$  and  $\pi \in \Pi_{\text{cons}}(\mathcal{N}_\Delta)$ , the assertion follows using (8) that for any  $\alpha \in (0, 1/2]$ ,

$$\liminf_{n \rightarrow \infty} \frac{\mathbb{E}R_n^\pi(\nu)}{\log n} \geq \frac{1}{2\Delta}.$$

Therefore, for any  $\Delta > 0$ ,  $\exists \nu \in \mathcal{N}_\Delta$  and an absolute constant  $C$  s.t. the expected cumulative regret of any consistent policy  $\pi$  on  $\nu$  satisfies  $\forall \alpha \leq 1/2$  and  $n$  large enough,  $\mathbb{E}R_n^\pi(\nu) \geq C\Delta^{-1} \log n$ .  $\square$

## B Proof of Theorem 2

We divide the horizon of play into epochs of length  $m$  each. For each  $k \geq 0$ , let  $S_k$  denote the cumulative pseudo-regret incurred by the algorithm when it is initialized at the beginning of epoch  $(2k+1)$  and continued until the end of the horizon of play, i.e., the algorithm starts at time  $2km+1$  and runs until time  $n$ . We are interested in an upper bound on  $\mathbb{E}R_n^\pi = \mathbb{E}S_0$ . To this end, suppose that the algorithm is initialized at time  $2km+1$ . Label the arms played in epochs  $(2k+1)$  and  $(2k+2)$  as ‘1’ and ‘2’ respectively. Let  $\bar{X}_i$  denote the empirical mean reward from  $m$  plays of arm  $i \in \{1, 2\}$ . Recall that  $t(i) \in \mathcal{T} = \{1, 2\}$  denotes the type of arm  $i$ , that type 1 is assumed optimal and lastly, that the probability of a new arm being of the optimal type is  $\alpha$ . Suppose that  $\mathbb{1}\{E\}$  denotes the indicator random variable associated with event  $E$ . Then, we have that  $S_k$  evolves according to the following stochastic recursive relation:

$$\begin{aligned} S_k &= \mathbb{1}\{t(1) = 1, t(2) = 2\} [\Delta m + \mathbb{1}\{\bar{X}_2 - \bar{X}_1 > \delta\} [n - (2k+2)m] + \mathbb{1}\{|\bar{X}_1 - \bar{X}_2| < \delta\} S_{k+1}] + \\ &\quad \mathbb{1}\{t(1) = 2, t(2) = 1\} [\Delta m + \mathbb{1}\{\bar{X}_1 - \bar{X}_2 > \delta\} [n - (2k+2)m] + \mathbb{1}\{|\bar{X}_1 - \bar{X}_2| < \delta\} S_{k+1}] + \\ &\quad \mathbb{1}\{t(1) = 2, t(2) = 2\} [2\Delta m + \mathbb{1}\{|\bar{X}_1 - \bar{X}_2| > \delta\} \Delta [n - (2k+2)m] + \mathbb{1}\{|\bar{X}_1 - \bar{X}_2| < \delta\} S_{k+1}] + \\ &\quad \mathbb{1}\{t(1) = 1, t(2) = 1\} \mathbb{1}\{|\bar{X}_1 - \bar{X}_2| < \delta\} S_{k+1}. \end{aligned}$$

Collecting like terms together,

$$\begin{aligned} S_k &= \mathbb{1}\{t(1) = 1, t(2) = 2\} \mathbb{1}\{\bar{X}_2 - \bar{X}_1 > \delta\} \Delta [n - (2k+2)m] + \\ &\quad \mathbb{1}\{t(1) = 2, t(2) = 1\} \mathbb{1}\{\bar{X}_1 - \bar{X}_2 > \delta\} \Delta [n - (2k+2)m] + \\ &\quad \mathbb{1}\{t(1) = 2, t(2) = 2\} \mathbb{1}\{|\bar{X}_1 - \bar{X}_2| > \delta\} \Delta [n - (2k+2)m] + \\ &\quad [\mathbb{1}\{t(1) \neq t(2)\} + 2\mathbb{1}\{t(1) = 2, t(2) = 2\}] \Delta m + \mathbb{1}\{|\bar{X}_1 - \bar{X}_2| < \delta\} S_{k+1}. \end{aligned} \quad (9)$$

Define the following conditional events:

$$E_1 := \{ \bar{X}_2 - \bar{X}_1 > \delta \mid t(1) = 1, t(2) = 2 \}, \quad (10)$$

$$E_2 := \{ \bar{X}_1 - \bar{X}_2 > \delta \mid t(1) = 2, t(2) = 1 \}, \quad (11)$$

$$E_3 := \{ |\bar{X}_1 - \bar{X}_2| > \delta \mid t(1) = 2, t(2) = 2 \}, \quad (12)$$

$$E_4 := \{ |\bar{X}_1 - \bar{X}_2| < \delta \mid t(1) = t(2) \}, \quad (13)$$

$$E_5 := \{ |\bar{X}_1 - \bar{X}_2| < \delta \mid t(1) \neq t(2) \}. \quad (14)$$

Taking expectations on both sides in (9) and rearranging, one obtains the following using (10),(11),(12),(13),(14):

$$\begin{aligned} \mathbb{E}S_k &= [\alpha(1-\alpha)\{\mathbb{P}(E_1) + \mathbb{P}(E_2)\} + (1-\alpha)^2\mathbb{P}(E_3)] \Delta [n - (2k+2)m] \\ &\quad + [2\alpha(1-\alpha) + 2(1-\alpha)^2] \Delta m + \mathbb{P}(|\bar{X}_1 - \bar{X}_2| < \delta) \mathbb{E}S_{k+1}. \end{aligned} \quad (15)$$

Notice that  $S_{k+1}$ , by definition, is independent of  $(X_{i,j})_{i \in \{1,2\}, 1 \leq j \leq m}$ , and hence  $\mathbb{E}[\mathbb{1}\{|\bar{X}_1 - \bar{X}_2| < \delta\} S_{k+1}] = \mathbb{P}(|\bar{X}_1 - \bar{X}_2| < \delta) \mathbb{E}S_{k+1}$  in (15). Further note that

$$\mathbb{P}(|\bar{X}_1 - \bar{X}_2| < \delta) = [\alpha^2 + (1-\alpha)^2] \mathbb{P}(E_4) + 2\alpha(1-\alpha)\mathbb{P}(E_5). \quad (16)$$

From (15) and (16), we conclude after a little rearrangement the following:

$$\mathbb{E}S_k = \xi_1 - \xi_2 k + \xi_3 \mathbb{E}S_{k+1}, \quad (17)$$

where the  $\xi_i$ 's do not depend on  $k$  and are given by

$$\xi_1 := \Delta [\alpha(1-\alpha)\{\mathbb{P}(E_1) + \mathbb{P}(E_2)\} + (1-\alpha)^2\mathbb{P}(E_3)] (n - 2m) + 2\Delta(1-\alpha)m, \quad (18)$$

$$\xi_2 := 2\Delta [\alpha(1-\alpha)\{\mathbb{P}(E_1) + \mathbb{P}(E_2)\} + (1-\alpha)^2\mathbb{P}(E_3)] m, \quad (19)$$

$$\xi_3 := [\alpha^2 + (1-\alpha)^2] \mathbb{P}(E_4) + 2\alpha(1-\alpha)\mathbb{P}(E_5). \quad (20)$$

Observe that the recursion in (17) is solvable in closed-form and admits the following solution:

$$\mathbb{E}S_0 = \xi_1 \sum_{k=0}^{l-1} \xi_3^k - \xi_2 \sum_{k=0}^{l-1} k \xi_3^k + \xi_3^l \mathbb{E}S_l, \quad (21)$$

where  $l := \lfloor n/(2m) \rfloor$ . Since the  $\xi_i$ 's are all non-negative for  $n \geq 2m$  and  $\mathbb{E}S_l \leq 2\Delta m$ , we have for  $n \geq 2m$ ,

$$\mathbb{E}R_n^\pi = \mathbb{E}S_0 \leq \frac{\xi_1}{1-\xi_3} + 2\Delta m. \quad (22)$$

Now using (10),(11),(12),(13),(14) and Hoeffding's inequality [4] along with the fact that the  $X_i$ 's are bounded in  $[0, 1]$ , we conclude

$$\{\mathbb{P}(E_1), \mathbb{P}(E_2)\} \leq \exp(-(\Delta + \delta)^2 m/2), \quad (23)$$

$$\{\mathbb{P}(E_3), \mathbb{P}(E_4^c)\} \leq 2 \exp(-\delta^2 m/2), \quad (24)$$

$$\mathbb{P}(E_5) \leq \exp(-(\Delta - \delta)^2 m/2). \quad (25)$$

From (18),(19),(20),(22),(23),(24) and (24), we conclude

$$\mathbb{E}R_n^\pi \leq \frac{2\Delta n \exp(-\delta^2 m/2) + \Delta m}{\alpha(1 - \exp(-(\Delta - \delta)^2 m/2))} + 2\Delta m.$$

Finally since  $m = \lceil (2/\delta^2) \log n \rceil$ , the stated assertion follows, i.e., for all  $n \geq 2m$ ,

$$\mathbb{E}R_n^\pi \leq 2\Delta \left(1 + \frac{1}{2\alpha}\right) \left[\left(\frac{2}{\delta^2}\right) \log n + 1\right] + \left(\frac{\Delta}{\alpha}\right) [2 + f(n, \delta, \Delta)], \quad (26)$$

where  $f(n, \delta, \Delta) = o(1)$  in  $n$  given by

$$f(n, \delta, \Delta) := \left(\frac{n^{-(\frac{\Delta-\delta}{\delta})^2}}{1 - n^{-(\frac{\Delta-\delta}{\delta})^2}}\right) \left[\left(\frac{2}{\delta^2}\right) \log n + 3\right]. \quad (27)$$

For  $n < 2m$ ,  $\mathbb{E}R_n^\pi \leq 2\Delta m$  follows trivially. Therefore, the bound in (26) is valid for all  $n \geq 1$ . Of course,  $\mathbb{E}R_n^\pi \leq \Delta n$  offers a sharper bound whenever  $\Delta$  is very small, similar to finite-armed settings. Thus in conclusion,  $\mathbb{E}R_n^\pi$  is bounded as follows for any  $n$ :

$$\mathbb{E}R_n^\pi \leq \min \left[ \Delta n, 2\Delta \left(1 + \frac{1}{2\alpha}\right) \left\{ \left(\frac{2}{\delta^2}\right) \log n + 1 \right\} + \left(\frac{\Delta}{\alpha}\right) \{2 + f(n, \delta, \Delta)\} \right].$$

□

## C Proof of Proposition 1

The statement of the proposition assumes  $|\mu_1 - \mu_2| = \Delta > 0$ . However, we will only prove it for the case where  $\mu_1 - \mu_2 = \Delta > 0$ . The proof for the other case is symmetric and an identical bound will follow. Fix an arbitrary  $(F_1, F_2) \in \mathcal{G}(\mu_1) \times \mathcal{G}(\mu_2)$  and consider the following stopping time:

$$\tau := \inf \left\{ n \geq 1 : \sum_{k=1}^n (\Psi_k - \bar{\theta}_n) < 0 \right\}, \quad (28)$$

where  $\Psi_k := Y_k^{F_1} - Y_k^{F_2}$  and  $\bar{\theta}_n := \theta_n/n$ . Note that  $\mathbb{E}\Psi_k = \Delta > 0$  (by assumption). Then, it follows that  $\mathbb{P}\left(\bigcap_{m=1}^{\infty} \left| \sum_{j=1}^m (Y_j^{F_1} - Y_j^{F_2}) \right| \geq \theta_m\right) \geq \mathbb{P}(\tau = \infty)$ . Therefore, it suffices to show that  $\mathbb{P}(\tau = \infty)$  is bounded away from 0. To this end, fix an arbitrary  $\lambda \in (0, 1)$  and let  $n_0 := \min\{k \in \mathbb{N} : \bar{\theta}_k \leq \lambda\Delta\}$ . Since  $\bar{\theta}_n \rightarrow 0$  as  $n \rightarrow \infty$  and  $\Delta > 0$ , it follows that  $n_0 < \infty$ . Suppose that  $\omega$  denotes an arbitrary sample-path and consider the following set:

$$E := \{\omega : \Psi_k(\omega) > \bar{\theta}_k; 1 \leq k \leq n_0\}. \quad (29)$$

Since Assumption 1 (main text) is satisfied,  $n_0 < \infty$  and  $\bar{\theta}_n$  is monotone decreasing in  $n$  with  $\bar{\theta}_1 < 1$ , it follows that  $\mathbb{P}(E)$ , as given below, is strictly positive.

$$\mathbb{P}(E) = \prod_{k=1}^{n_0} \mathbb{P}(\Psi_k > \bar{\theta}_k) > 0, \text{ where } n_0 = \min\{k \in \mathbb{N} : \bar{\theta}_k \leq \lambda\Delta\}. \quad (30)$$

Notice that  $\tau > n_0$  on the event indicated by  $E$ . In particular,

$$\begin{aligned} \tau|E &= \inf \left\{ n \geq n_0 + 1 : \sum_{k=n_0+1}^n (\Psi_k - \bar{\theta}_n) < -\sum_{k=1}^{n_0} (\Psi_k - \bar{\theta}_n) \mid E \right\} \\ &\stackrel{(\dagger)}{\geq} \inf \left\{ n \geq n_0 + 1 : \sum_{k=n_0+1}^n (\Psi_k - \bar{\theta}_n) < -\sum_{k=1}^{n_0} (\bar{\theta}_k - \bar{\theta}_n) \mid E \right\} \\ &\stackrel{(\ddagger)}{\geq} \inf \left\{ n \geq n_0 + 1 : \sum_{k=n_0+1}^n (\Psi_k - \bar{\theta}_n) < -\sum_{k=1}^{n_0} (\bar{\theta}_k - \bar{\theta}_{n_0}) \mid E \right\} \\ &\stackrel{(\bullet)}{\geq} \inf \left\{ n \geq n_0 + 1 : \sum_{k=n_0+1}^n (\Psi_k - \lambda\Delta) < -\sum_{k=1}^{n_0} (\bar{\theta}_k - \bar{\theta}_{n_0}) \mid E \right\} \\ &\stackrel{(\star)}{=} n_0 + \inf \left\{ n \geq 1 : \sum_{k=1}^n (\Psi'_k - \lambda\Delta) < -\eta \right\}, \end{aligned} \quad (31)$$

where  $(\dagger)$  follows from (29),  $(\ddagger)$  follows since  $\bar{\theta}_n \leq \bar{\theta}_{n_0}$  for  $n \geq n_0$ ,  $(\bullet)$  since  $\bar{\theta}_n \leq \lambda\Delta$  for  $n \geq n_0$ , and  $(\star)$  holds with  $\eta := \sum_{k=1}^{n_0} (\bar{\theta}_k - \bar{\theta}_{n_0})$  and  $\Psi'_k := \Psi_{n_0+k}$  since  $(\Psi'_k)_{k \in \mathbb{N}}$  is independent of  $E$ . Note that  $\eta > 0$  since  $\bar{\theta}_n$  is monotone decreasing in  $n$ . Now consider the following stopping time:

$$\tau' := \inf \left\{ n \geq 1 : \sum_{k=1}^n (\Psi'_k - \lambda\Delta) < -\eta \right\}. \quad (32)$$

It follows from (31) and (32) that  $\mathbb{P}(\tau = \infty|E) \geq \mathbb{P}(\tau' = \infty)$ . We next show that  $\mathbb{P}(\tau' = \infty)$  is bounded away from 0.

Let  $S_n := \sum_{k=1}^n (\Psi'_k - \lambda\Delta)$ , with  $S_0 := 0$ . Since the  $\Psi'_k$ 's are i.i.d. with  $\mathbb{E}\Psi'_1 = \Delta$  and  $|\Psi'_k| \leq 1$ , it follows that  $W_n := \exp(aS_n)$  is a Martingale w.r.t.  $(\Psi'_k)_{k \in \mathbb{N}}$ , where ' $a$ ' is the non-zero solution to  $\mathbb{E}[\exp(a(\Psi'_1 - \lambda\Delta))] = 1$  (Note that  $\mathbb{E}\Psi'_1 = \Delta > 0$  and  $\lambda \in (0, 1)$  ensures  $a < 0$ ). Fix an arbitrary  $b > 0$  and define  $T_{\eta,b} := \inf\{n \geq 1 : S_n \notin [-\eta, b]\}$  (We already know that  $\eta > 0$ ). By Doob's Optional Stopping Theorem [3], it follows that  $\mathbb{E}W_{\min(T_{\eta,b}, n)} = \mathbb{E}W_0 = 1$ . Furthermore, since the stopped Martingale  $W_{\min(T_{\eta,b}, n)}$  is uniformly integrable, we in fact have  $\mathbb{E}W_{T_{\eta,b}} = 1$ . Thereafter using Markov's inequality, we obtain  $\mathbb{P}(S_{T_{\eta,b}} < -\eta) = \mathbb{P}(W_{T_{\eta,b}} > e^{-\eta a}) \leq \exp(\eta a)$ .

Since  $b > 0$  is arbitrary, taking  $\lim_{b \rightarrow \infty}$  on both sides and invoking the Bounded Convergence Theorem, we finally conclude that  $\mathbb{P}(\tau' = \infty) = \mathbb{P}(S_{T_{n,\infty}} \geq -\eta) \geq 1 - \exp(-\eta a)$ , and hence

$$\mathbb{P}(\tau = \infty | E) \geq 1 - \exp(-\eta a) > 0. \quad (33)$$

In conclusion,

$$\begin{aligned} \mathbb{P}\left(\bigcap_{m=1}^{\infty} \left| \sum_{j=1}^m (Y_j^{F_1} - Y_j^{F_2}) \right| \geq \theta_m\right) &\geq \mathbb{P}(\tau = \infty) \geq \mathbb{P}(\tau = \infty | E) \mathbb{P}(E) \\ &\stackrel{(*)}{\geq} (1 - \exp(-\eta a)) \prod_{k=1}^{n_0} \mathbb{P}(\Psi_k > \bar{\theta}_k) > 0, \end{aligned}$$

where  $(*)$  follows from (30) and (33). Since  $(F_1, F_2) \in \mathcal{G}(\mu_1) \times \mathcal{G}(\mu_2)$  is arbitrary, taking  $\min_{F_1 \in \mathcal{G}(\mu_1), F_2 \in \mathcal{G}(\mu_2)}$  on both the sides above appealing to the fact that the  $\mathcal{G}(\mu_i)$ 's are finite, proves our assertion.  $\square$

### D Proof of Theorem 3

Consider the first epoch and assign the labels 1, 2 to the two arms picked to be played in this epoch. Suppose  $N_i(n)$  denotes the number of times arm  $i$  is played up to and including time  $n$ . Let  $M_n := \min(N_1(n), N_2(n))$  and define the following stopping time:

$$\tau := \inf \left\{ n \geq 2 : \left| \sum_{k=1}^{M_n} (X_{1,k} - X_{2,k}) \right| < \theta_{M_n} \right\},$$

where the sequence  $\Theta \equiv (\theta_m)_{m \in \mathbb{N}}$  is defined through (2) (main text). Then,  $\tau$  denotes the time of the terminal play in the first epoch after which the algorithm starts over again. Recall that  $t(i)$  denotes the type of arm  $i$  and define the following conditional stopping times:

$$\tau_I := \tau \mid \{t(1) = t(2) = 2\}, \quad (34)$$

$$\tau_D := \tau \mid \{t(1) \neq t(2)\}, \quad (35)$$

where the subscripts  $I$  and  $D$  above indicate ‘‘Identical’’ and ‘‘Distinct’’ types, respectively. Let  $S_n$  denote the cumulative pseudo-regret of UCB1 after  $n$  plays in a stochastic two-armed bandit problem with separation  $\Delta$ . Recall that  $R_n^\pi$  denotes the cumulative pseudo-regret of  $\pi = \text{ALG}(\text{UCB1}, \Theta, 2)$  after  $n$  plays; we shall suppress the superscript  $\pi$  for notational simplicity and write  $R_n$  for  $R_n^\pi$ . For any  $n \in \mathbb{N}$ , let  $R'_n$  be an i.i.d. copy of  $R_n$ . Then,  $R_n$  must satisfy the following stochastic recursive relation:

$$\begin{aligned} R_n &= \mathbb{1}\{t(1) \neq t(2)\} S_{\min(\tau, n)} + \mathbb{1}\{t(1) = t(2) = 2\} \Delta \min(\tau, n) + R'_{n - \min(\tau, n)} \\ &\leq \mathbb{1}\{t(1) \neq t(2)\} S_n + \mathbb{1}\{t(1) = t(2) = 2\} \Delta \tau + R'_{n - \min(\tau, n)} \\ &= \mathbb{1}\{t(1) \neq t(2)\} S_n + \mathbb{1}\{t(1) = t(2) = 2\} \Delta \tau + \sum_{k=2}^n \mathbb{1}\{\tau = k\} R'_{n-k} \\ &\leq \mathbb{1}\{t(1) \neq t(2)\} S_n + \mathbb{1}\{t(1) = t(2) = 2\} \Delta \tau + \mathbb{1}\{\tau \leq n\} R'_n, \end{aligned} \quad (36)$$

where the last step holds since  $R'_{n-k} \leq R'_n \forall k \leq n$  (this follows trivially since  $\pi$  is agnostic to the horizon of play<sup>1</sup>). Taking expectations on both sides of (36), we obtain

$$\begin{aligned} \mathbb{E}R_n &\stackrel{(\dagger)}{\leq} 2\alpha(1 - \alpha)\mathbb{E}S_n + (1 - \alpha)^2\Delta\mathbb{E}\tau_I + [2\alpha(1 - \alpha)\mathbb{P}(\tau_D \leq n) + \alpha^2 + (1 - \alpha)^2] \mathbb{E}R_n \\ &\stackrel{(\ddagger)}{\leq} 2\alpha(1 - \alpha)\mathbb{E}S_n + (1 - \alpha)^2\Delta\mathbb{E}\tau_I + [2\alpha(1 - \alpha)(1 - \beta_\Delta) + \alpha^2 + (1 - \alpha)^2] \mathbb{E}R_n \\ &= 2\alpha(1 - \alpha)\mathbb{E}S_n + (1 - \alpha)^2\Delta\mathbb{E}\tau_I + (1 - 2\beta_\Delta\alpha(1 - \alpha)) \mathbb{E}R_n \\ \implies \mathbb{E}R_n &\leq \left(\frac{1}{\beta_\Delta}\right) \mathbb{E}S_n + \left(\frac{(1 - \alpha)\Delta\mathbb{E}\tau_I}{2\beta_\Delta\alpha}\right), \end{aligned}$$

<sup>1</sup>We could not claim this directly for Algorithm 1 as it depended on ex ante knowledge of the horizon of play.

where  $(\dagger)$  uses (34), (35) and the fact that  $\mathcal{D}(\mathcal{T}) = (\alpha, 1 - \alpha)$ , and  $(\ddagger)$  follows from part (i) of Lemma 2 (see Appendix F). We also know from part (ii) of Lemma 2 that  $\mathbb{E}\tau_I < C_0$ , where  $C_0$  is a constant that depends on the user-defined parameters  $(m_0, \gamma)$ . The proof now concludes by invoking Theorem 1 of [1] for an upper bound on  $\mathbb{E}S_n$  in order to obtain the desired upper bound on  $\mathbb{E}R_n$ , i.e.,

$$\begin{aligned}\mathbb{E}R_n &\leq \left(\frac{8}{\Delta\beta_\Delta}\right) \log n + \left(1 + \frac{\pi^2}{3} + \frac{(1-\alpha)C_0}{2\alpha}\right) \left(\frac{\Delta}{\beta_\Delta}\right) \\ &\leq 8(\Delta\beta_\Delta)^{-1} \log n + (C_1 + \alpha^{-1}C_2) \beta_\Delta^{-1} \Delta,\end{aligned}$$

where  $C_1 := 1 + \pi^2/3$  and  $C_2 := C_0/2$ .  $\square$

## E Proof of Theorem 4

### E.1 Proof of part (i)

For  $i \in \{1, 2\}$ , define  $B_{i,s,t} := \bar{X}_i(s) + \sqrt{(2 \log t)/s}$ , where  $\bar{X}_i(s)$  denotes the empirical mean reward from the first  $s$  plays of arm  $i$ . UCB1 [1] plays each arm  $i \in \{1, 2\}$  once at  $t \in \{1, 2\}$  and thereafter for  $t \in \{3, 4, \dots, n\}$ , plays the arm  $I_t \in \arg \max_{i \in \{1, 2\}} B_{i, N_i(t-1), t-1}$ . Then, note that the following holds for any integer  $u > 1$ :

$$\{N_1(n) > u\} \subseteq \{\exists t \in \{u+2, \dots, n\} : B_{1,u,t-1} \geq B_{2,t-u-1,t-1}\}.$$

Thus, using the Union bound,

$$\begin{aligned}\mathbb{P}(N_1(n) > u) &\leq \sum_{t=u+2}^n \mathbb{P}(B_{1,u,t-1} \geq B_{2,t-u-1,t-1}) \\ &= \sum_{t=u+1}^{n-1} \mathbb{P}(B_{1,u,t} \geq B_{2,t-u,t}) \\ &= \sum_{t=u+1}^{n-1} \mathbb{P}\left(\bar{X}_1(u) - \bar{X}_2(t-u) \geq \sqrt{2 \log t} \left(\frac{1}{\sqrt{t-u}} - \frac{1}{\sqrt{u}}\right)\right).\end{aligned}\quad (37)$$

Note that  $\mathbb{E}[\bar{X}_1(u) - \bar{X}_2(t-u)] = 0$ . Now consider an arbitrary  $\epsilon \in (0, 1/2)$ . For  $t < n$  and  $u = (1/2 + \epsilon)n$ , notice that

$$\frac{1}{\sqrt{t-u}} - \frac{1}{\sqrt{u}} \geq \frac{1}{\sqrt{t}} \left(\frac{1}{\sqrt{\frac{1}{2} - \epsilon}} - \frac{1}{\sqrt{\frac{1}{2} + \epsilon}}\right) > 0.$$

This lets us apply Hoeffding's inequality [4] to (37) when  $u = (1/2 + \epsilon)n$ . Applying the inequality to (37), leveraging the fact that the rewards are uniformly bounded in  $[0, 1]$ , we obtain

$$\begin{aligned}\mathbb{P}(N_1(n) > u) &\leq \sum_{t=u+1}^{n-1} \exp\left(-4 \left(1 - 2\sqrt{\frac{u(t-u)}{t^2}}\right) \log t\right) \\ &< \sum_{t=u+1}^{n-1} \exp\left(-4 \left(1 - \sqrt{1 - 4\epsilon^2}\right) \log t\right),\end{aligned}$$

where the last step above follows since  $u(t-u) < (1/4 - \epsilon^2)t$  for  $u = (1/2 + \epsilon)n$  and  $t < n$ . Now substituting  $u = (1/2 + \epsilon)n$  above, we obtain

$$\mathbb{P}\left(N_1(n) > \left(\frac{1}{2} + \epsilon\right)n\right) < \sum_{t=\frac{n}{2}}^{n-1} \exp\left(-4 \left(1 - \sqrt{1 - 4\epsilon^2}\right) \log t\right) < 8n^{-(3-4\sqrt{1-4\epsilon^2})}.$$

Notice that the upper bound is meaningful only when  $3 - 4\sqrt{1 - 4\epsilon^2} > 0 \iff \epsilon > \sqrt{7}/8$ , and therefore holds for all  $\epsilon \in (0, 1/2)$  trivially. Since our proof is symmetric w.r.t. the arm labels, an identical result holds also for the other arm and therefore, the stated assertion follows.  $\square$

## E.2 Proof of part (ii)

Note that the following is true for any integer  $u > 1$  and  $i \in \{1, 2\}$ :

$$N_i(n) \leq u + \sum_{t=u+1}^n \mathbb{1}\{I_t = i, N_i(t-1) \geq u\},$$

where  $I_t \in \{1, 2\}$  indicates the arm played at time  $t$ . We set  $u = (1/2 + \epsilon)n$  for an arbitrary  $\epsilon \in (0, 1/2)$  and without loss of generality, carry out the rest of the analysis fixing  $i = 1$ . Therefore,

$$\begin{aligned} N_1(n) &\leq \left(\frac{1}{2} + \epsilon\right)n + \sum_{t=(\frac{1}{2}+\epsilon)n+1}^n \mathbb{1}\left\{I_t = 1, N_1(t-1) \geq \left(\frac{1}{2} + \epsilon\right)n\right\} \\ &\leq \left(\frac{1}{2} + \epsilon\right)n + \sum_{t=(\frac{1}{2}+\epsilon)n+1}^n \mathbb{1}\left\{B_{1,N_1(t-1),t-1} \geq B_{2,N_2(t-1),t-1}, N_1(t-1) \geq \left(\frac{1}{2} + \epsilon\right)n\right\}, \end{aligned}$$

where  $B_{i,s,t} := \overline{X}_i(s) + \sqrt{(2 \log t)/s}$  for  $i \in \{1, 2\}$ , with  $\overline{X}_i(s)$  denoting the empirical mean reward from the first  $s$  plays of arm  $i$ . Then,

$$\begin{aligned} N_1(n) &\leq \left(\frac{1}{2} + \epsilon\right)n + \sum_{t=(\frac{1}{2}+\epsilon)n}^{n-1} \mathbb{1}\left\{B_{1,N_1(t),t} \geq B_{2,N_2(t),t}, N_1(t) \geq \left(\frac{1}{2} + \epsilon\right)n\right\} \\ &\leq \left(\frac{1}{2} + \epsilon\right)n + \sum_{t=(\frac{1}{2}+\epsilon)n}^{n-1} \mathbb{1}\left\{B_{1,N_1(t),t} \geq B_{2,N_2(t),t}, N_1(t) \geq \left(\frac{1}{2} + \epsilon\right)t\right\} \\ &= \left(\frac{1}{2} + \epsilon\right)n + Z_n, \end{aligned} \tag{38}$$

where  $Z_n := \sum_{t=(\frac{1}{2}+\epsilon)n}^{n-1} \mathbb{1}\{B_{1,N_1(t),t} \geq B_{2,N_2(t),t}, N_1(t) \geq (\frac{1}{2} + \epsilon)t\}$ . Now,

$$\begin{aligned} &\mathbb{E}Z_n \\ &= \sum_{t=(\frac{1}{2}+\epsilon)n}^{n-1} \mathbb{P}\left(B_{1,N_1(t),t} \geq B_{2,N_2(t),t}, N_1(t) \geq \left(\frac{1}{2} + \epsilon\right)t\right) \\ &= \sum_{t=(\frac{1}{2}+\epsilon)n}^{n-1} \mathbb{P}\left(\frac{\sum_{j=1}^{N_1(t)} X_{1,j}}{N_1(t)} - \frac{\sum_{j=1}^{N_2(t)} X_{2,j}}{N_2(t)} \geq \sqrt{2 \log t} \left(\frac{1}{\sqrt{N_2(t)}} - \frac{1}{\sqrt{N_1(t)}}\right), N_1(t) \geq \left(\frac{1}{2} + \epsilon\right)t\right) \\ &= \sum_{t=(\frac{1}{2}+\epsilon)n}^{n-1} \mathbb{P}\left(\frac{\sum_{j=1}^{N_1(t)} Y_{1,j}}{N_1(t)} - \frac{\sum_{j=1}^{N_2(t)} Y_{2,j}}{N_2(t)} \geq \sqrt{2 \log t} \left(\frac{1}{\sqrt{N_2(t)}} - \frac{1}{\sqrt{N_1(t)}}\right), N_1(t) \geq \left(\frac{1}{2} + \epsilon\right)t\right), \end{aligned} \tag{39}$$

where  $Y_{i,j} := X_{i,j} - \mathbb{E}X_{i,j}$  for  $i \in \{1, 2\}$ ,  $j \in \mathbb{N}$ . Note that the last equality above follows since the mean rewards of both the arms are equal. We therefore have

$$\begin{aligned} &\mathbb{E}Z_n \\ &= \sum_{t=(\frac{1}{2}+\epsilon)n}^{n-1} \mathbb{P}\left(\frac{\sum_{j=1}^{N_1(t)} Y_{1,j}}{N_1(t)} - \frac{\sum_{j=1}^{N_2(t)} Y_{2,j}}{N_2(t)} \geq \sqrt{2 \log t} \left(\frac{1}{\sqrt{N_2(t)}} - \frac{1}{\sqrt{N_1(t)}}\right), N_1(t) \geq \left(\frac{1}{2} + \epsilon\right)t\right) \\ &\leq \sum_{t=(\frac{1}{2}+\epsilon)n}^{n-1} \mathbb{P}\left(\frac{\sum_{j=1}^{N_1(t)} Y_{1,j}}{N_1(t)} - \frac{\sum_{j=1}^{N_2(t)} Y_{2,j}}{N_2(t)} \geq \sqrt{\frac{2 \log t}{t}} \left(\frac{1}{\sqrt{(\frac{1}{2} - \epsilon)}} - \frac{1}{\sqrt{(\frac{1}{2} + \epsilon)}}\right), N_1(t) \geq \left(\frac{1}{2} + \epsilon\right)t\right) \\ &\leq \sum_{t=(\frac{1}{2}+\epsilon)n}^{n-1} \mathbb{P}\left(W_t \geq \frac{1}{\sqrt{(\frac{1}{2} - \epsilon)}} - \frac{1}{\sqrt{(\frac{1}{2} + \epsilon)}}\right), \end{aligned} \tag{40}$$



where  $W_t := \sqrt{\frac{t}{2 \log t}} \left( \frac{\sum_{j=1}^{N_1(t)} Y_{1,j}}{N_1(t)} - \frac{\sum_{j=1}^{N_2(t)} Y_{2,j}}{N_2(t)} \right)$ . Now,

$$\begin{aligned}
& |W_t| \\
& \leq \sqrt{\frac{t}{2 \log t}} \left( \left| \frac{\sum_{j=1}^{N_1(t)} Y_{1,j}}{N_1(t)} \right| + \left| \frac{\sum_{j=1}^{N_2(t)} Y_{2,j}}{N_2(t)} \right| \right) \\
& = \sqrt{\frac{t}{\log t}} \left( \sqrt{\frac{\log \log N_1(t)}{N_1(t)}} \left| \frac{\sum_{j=1}^{N_1(t)} Y_{1,j}}{\sqrt{2N_1(t) \log \log N_1(t)}} \right| + \sqrt{\frac{\log \log N_2(t)}{N_2(t)}} \left| \frac{\sum_{j=1}^{N_2(t)} Y_{2,j}}{\sqrt{2N_2(t) \log \log N_2(t)}} \right| \right) \\
& \leq \sqrt{\frac{t}{\log t}} \left( \sqrt{\frac{\log \log t}{N_1(t)}} \left| \frac{\sum_{j=1}^{N_1(t)} Y_{1,j}}{\sqrt{2N_1(t) \log \log N_1(t)}} \right| + \sqrt{\frac{\log \log t}{N_2(t)}} \left| \frac{\sum_{j=1}^{N_2(t)} Y_{2,j}}{\sqrt{2N_2(t) \log \log N_2(t)}} \right| \right) \\
& = \sqrt{\frac{\log \log t}{\log t}} \left( \sqrt{\frac{t}{N_1(t)}} \left| \frac{\sum_{j=1}^{N_1(t)} Y_{1,j}}{\sqrt{2N_1(t) \log \log N_1(t)}} \right| + \sqrt{\frac{t}{N_2(t)}} \left| \frac{\sum_{j=1}^{N_2(t)} Y_{2,j}}{\sqrt{2N_2(t) \log \log N_2(t)}} \right| \right). \tag{41}
\end{aligned}$$

Notice that the following can be deduced from part (i) of Theorem 4 using the Borel-Cantelli Lemma:

$$\liminf_{t \rightarrow \infty} \frac{N_i(t)}{t} > \frac{1}{2} - \frac{\sqrt{3}}{4} \quad \text{w.p. 1 } \forall i \in \{1, 2\}. \tag{42}$$

In addition to the result in (42) that holds *w.p. 1*, we also know that  $N_i(t)$ , for any  $i \in \{1, 2\}$  and  $t \geq 0$ , can be lower bounded *pathwise* by a deterministic non-decreasing function of time, say  $\lambda(t)$ , that grows to  $+\infty$  as  $t \rightarrow \infty$ . This is a trivial consequence due to the structure of the UCB1 policy and the fact that the rewards are uniformly bounded. We therefore have for any  $i \in \{1, 2\}$  and  $t \geq 0$ ,

$$\left| \frac{\sum_{j=1}^{N_i(t)} Y_{i,j}}{\sqrt{2N_i(t) \log \log N_i(t)}} \right| \leq \sup_{m \geq \lambda(t)} \left| \frac{\sum_{j=1}^m Y_{i,j}}{\sqrt{2m \log \log m}} \right|.$$

Now for any fixed  $i \in \{1, 2\}$ ,  $\mathbb{E}Y_{i,j} \sim \text{i.i.d. } \forall j$  with  $\mathbb{E}Y_{i,1} = 0$  and  $\text{Var}(Y_{i,1}) = \text{Var}(X_{i,1}) \leq 1$ . Also,  $\lambda(t)$  is non-decreasing and  $\lambda(t) \uparrow \infty$ . Therefore, the Law of the Iterated Logarithm [5] implies

$$\limsup_{t \rightarrow \infty} \left| \frac{\sum_{j=1}^{N_i(t)} Y_{i,j}}{\sqrt{2N_i(t) \log \log N_i(t)}} \right| \leq 1 \quad \text{w.p. 1 } \forall i \in \{1, 2\}. \tag{43}$$

From (41), (42) and (43), we conclude that

$$\lim_{t \rightarrow \infty} W_t = 0 \quad \text{w.p. 1.} \tag{44}$$

Now consider an arbitrary  $\delta > 0$ . Then,

$$\begin{aligned}
\mathbb{P} \left( \frac{N_1(n)}{n} \geq \left( \frac{1}{2} + \epsilon + \delta \right) \right) &= \mathbb{P} \left( N_1(n) - \left( \frac{1}{2} + \epsilon \right) n \geq \delta n \right) \\
&\stackrel{(\dagger)}{\leq} \mathbb{P}(Z_n \geq \delta n) \\
&\leq \frac{\mathbb{E}Z_n}{\delta n} \\
&\stackrel{(\ddagger)}{\leq} \frac{1}{\delta n} \sum_{t=(\frac{1}{2}+\epsilon)n}^{n-1} \mathbb{P} \left( W_t \geq \frac{1}{\sqrt{(\frac{1}{2}-\epsilon)}} - \frac{1}{\sqrt{(\frac{1}{2}+\epsilon)}} \right),
\end{aligned}$$

where (†) follows using (38), (‡) using Markov's inequality and (★) from (40). Now,

$$\begin{aligned}
\mathbb{P}\left(\frac{N_1(n)}{n} \geq \left(\frac{1}{2} + \epsilon + \delta\right)\right) &\leq \frac{1}{\delta n} \sum_{t=(\frac{1}{2}+\epsilon)n}^{n-1} \mathbb{P}\left(W_t \geq \frac{1}{\sqrt{(\frac{1}{2}-\epsilon)}} - \frac{1}{\sqrt{(\frac{1}{2}+\epsilon)}}\right) \\
&\leq \left(\frac{\frac{1}{2}-\epsilon}{\delta}\right) \sup_{(\frac{1}{2}+\epsilon)n \leq t \leq n-1} \mathbb{P}\left(W_t \geq \frac{1}{\sqrt{(\frac{1}{2}-\epsilon)}} - \frac{1}{\sqrt{(\frac{1}{2}+\epsilon)}}\right) \\
&\leq \left(\frac{\frac{1}{2}-\epsilon}{\delta}\right) \sup_{t \geq n/2} \mathbb{P}\left(W_t \geq \frac{1}{\sqrt{(\frac{1}{2}-\epsilon)}} - \frac{1}{\sqrt{(\frac{1}{2}+\epsilon)}}\right). \quad (45)
\end{aligned}$$

Using (44) and (45), we conclude that

$$\limsup_{n \rightarrow \infty} \mathbb{P}\left(\frac{N_1(n)}{n} \geq \left(\frac{1}{2} + \epsilon + \delta\right)\right) \leq \left(\frac{\frac{1}{2}-\epsilon}{\delta}\right) \limsup_{n \rightarrow \infty} \mathbb{P}\left(W_n \geq \frac{1}{\sqrt{(\frac{1}{2}-\epsilon)}} - \frac{1}{\sqrt{(\frac{1}{2}+\epsilon)}}\right) = 0.$$

Since  $\delta > 0$  is arbitrary, it follows that  $\lim_{n \rightarrow \infty} \mathbb{P}\left(\frac{N_1(n)}{n} \geq \frac{1}{2} + \epsilon\right) = 0$  for any  $\epsilon > 0$ . Since our proof is symmetric w.r.t. the arms, we also have  $\lim_{n \rightarrow \infty} \mathbb{P}\left(\frac{N_2(n)}{n} \geq \frac{1}{2} + \epsilon\right) = 0 \implies \lim_{n \rightarrow \infty} \mathbb{P}\left(\frac{N_1(n)}{n} \leq \frac{1}{2} - \epsilon\right) = 0$ . Therefore,  $\lim_{n \rightarrow \infty} \mathbb{P}\left(\left|\frac{N_i(n)}{n} - \frac{1}{2}\right| \geq \epsilon\right) = 0$  for  $i \in \{1, 2\}$  and any  $\epsilon > 0$ .  $\square$

## F Ancillary results

**Lemma 1** Consider a stochastic two-armed bandit with rewards bounded in  $[0, 1]$ . Suppose that the reward distributions of the two arms  $(F_1, F_2) \in \mathcal{G}(\mu_1) \times \mathcal{G}(\mu_2)$  satisfy Assumption 1 (main text). Let  $N_i(n)$  denote the number of times arm  $i$  is played by UCB1 [1] up to and including time  $n$ . At any time  $n^+$ ,  $(X_{i,k})_{k=1}^m$  denotes the sequence of rewards realized from the first  $m \leq N_i(n)$  plays of arm  $i$ . For each  $n \in \mathbb{N}$ , let  $M_n := \min(N_1(n), N_2(n))$  and consider the following stopping times:

$$\tau := \inf \left\{ n \geq 2 : \left| \sum_{k=1}^{M_n} (X_{1,k} - X_{2,k}) \right| < \theta_{M_n} \right\}, \quad (46)$$

$$\tau' := \inf \left\{ n \geq 1 : \left| \sum_{k=1}^n (X_{1,k} - X_{2,k}) \right| < \theta_n \right\}, \quad (47)$$

where the sequence  $\Theta \equiv \{\theta_n : n = 1, 2, \dots\}$  is defined through (2) (main text). Then,  $M_\tau = \tau'$  pathwise.

**Lemma 2** Consider the setting of Lemma 1. Recall that  $\mathcal{T} = \{1, 2\}$  and  $t(i) \in \mathcal{T}$  denotes the type of arm  $i$ . Define the following conditional stopping times:

$$\tau_D := \tau \mid t(1) \neq t(2), \quad (48)$$

$$\tau_I := \tau \mid t(1) = t(2), \quad (49)$$

where the subscripts  $D$  and  $I$  indicate “Distinct” and “Identical” types, respectively. Then, the following results hold:

- (i)  $\mathbb{P}(\tau_D = \infty) \geq \beta_\Delta$ , where  $\beta_\Delta$  is as defined in (1) (main text).
- (ii)  $\mathbb{E}\tau_I < C_0$ , where  $C_0$  is a constant that depends on the user-defined parameters  $(m_0, \gamma)$  featuring in (2) (main text) that ensure  $\Theta$  satisfies the conditions of Proposition 1 (main text).

### F.1 Proof of Lemma 1

We begin by noting the following facts:

1. *Fact 1:*  $(M_n)_{n \geq 2}$  is a non-decreasing sequence of natural numbers (starting from  $M_2 = 1$ ), with  $M_{n+1} \leq M_n + 1$ .
2. *Fact 2:* For each  $i \in \{1, 2\}$ ,  $\liminf_{n \rightarrow \infty} N_i(n) = \infty$  pathwise<sup>2</sup> (consequence of UCB1 and uniformly bounded rewards). Consequently,  $\liminf_{n \rightarrow \infty} M_n = \infty$  pathwise.

Define  $\Psi_k := X_{1,k} - X_{2,k}$ . Fix some  $m \in \mathbb{N}$  and consider an arbitrary sample-path  $\omega$  such that  $M_\tau(\omega) = m$ . Then on  $\omega$ , we must also have  $m = \inf \left\{ l \geq 1 : \left| \sum_{k=1}^l \Psi_k(\omega) \right| < \theta_l \right\}$  (follows from the definitions of  $\tau$  and  $\tau'$ ). Since the choice of  $m$  is arbitrary (due to *Fact 1* and *Fact 2*), it must be that on any arbitrary  $\omega$ ,  $M_\tau(\omega) = \inf \left\{ l \geq 1 : \left| \sum_{k=1}^l \Psi_k(\omega) \right| < \theta_l \right\}$ . The assertion thus follows.  $\square$

### F.2 Proof of Lemma 2 part (i)

We know from Lemma 1 that  $M_\tau = \tau'$ . In particular, this also implies  $M_{\tau_D} = \tau' \mid t(1) \neq t(2)$ . Notice that  $\tau_D \geq 2M_{\tau_D}$  is always true. Thus, it follows that  $\tau_D \geq 2\tau' \mid t(1) \neq t(2)$ . Therefore,  $\mathbb{P}(\tau_D = \infty) \geq \mathbb{P}(\tau' = \infty \mid t(1) \neq t(2)) = \mathbb{P}(\tau' = \infty \mid t(1) = 1, t(2) = 2) \geq \beta_\Delta$  (Recall from (1) (main text) the definition of  $\beta_\Delta$ ). The assertion thus follows.  $\square$

### F.3 Proof of Lemma 2 part (ii)

Throughout this proof, the condition  $t(1) = t(2)$  is implicit and we shall avoid writing it explicitly to simplify notation. Let  $\Psi_k := X_{1,k} - X_{2,k}$ . Consider the following:

$$\begin{aligned}
\mathbb{P}(\tau_I > n) &= \mathbb{P} \left( \bigcap_{l=2}^n \left\{ \left| \sum_{k=1}^{M_l} \Psi_k \right| \geq \theta_{M_l} \right\} \right) \\
&\leq \mathbb{P} \left( \left| \sum_{k=1}^{M_n} \Psi_k \right| \geq \theta_{M_n} \right) \\
&= \sum_{m=1}^n \mathbb{P} \left( \left| \sum_{k=1}^{M_n} \Psi_k \right| \geq \theta_{M_n}, N_1(n) = m \right) \\
&= \sum_{m=1}^n \mathbb{P} \left( \left| \sum_{k=1}^{\min(m, n-m)} \Psi_k \right| \geq \theta_{\min(m, n-m)}, N_1(n) = m \right).
\end{aligned}$$

Consider an arbitrary  $\kappa \in (0, 1/2 - \sqrt{3}/4)$ . Splitting the above summation three-ways, we obtain

$$\begin{aligned}
\mathbb{P}(\tau_I > n) &\leq \sum_{m=1}^{\kappa n} \mathbb{P}(N_1(n) = m) + \sum_{m=\kappa n}^{(1-\kappa)n} \mathbb{P} \left( \left| \sum_{k=1}^{\min(m, n-m)} \Psi_k \right| \geq \theta_{\min(m, n-m)} \right) \\
&\quad + \sum_{m=(1-\kappa)n}^n \mathbb{P}(N_1(n) = m) \\
&\leq \mathbb{P}(N_1(n) \leq \kappa n) + \mathbb{P}(N_2(n) \leq \kappa n) + \sum_{m=\kappa n}^{(1-\kappa)n} \mathbb{P} \left( \left| \sum_{k=1}^{\min(m, n-m)} \Psi_k \right| \geq \theta_{\min(m, n-m)} \right) \\
&\leq \mathbb{P}(N_1(n) \leq \kappa n) + \mathbb{P}(N_2(n) \leq \kappa n) + 2 \sum_{m=\kappa n}^{(1-\kappa)n} \exp \left( \frac{-\theta_{\min(m, n-m)}^2}{2 \min(m, n-m)} \right),
\end{aligned}$$

where the last step follows from Hoeffding's inequality [4] using the fact that  $\Psi_k$ 's are i.i.d. with  $\mathbb{E}\Psi_1 = 0$  and  $|\Psi_1| \leq 1$ . Recall that for any  $\kappa \in (0, 1/2 - \sqrt{3}/4)$ , part (i) of Theorem 4 guarantees that  $\sum_{n=1}^T (\mathbb{P}(N_1(n) \leq \kappa n) + \mathbb{P}(N_2(n) \leq \kappa n)) = \mathcal{O}_T(1)$  (the subscript  $T$  is added to indicate that

<sup>2</sup>For unbounded rewards, this would hold w.p. 1, not pathwise.

the asymptotic scaling is w.r.t.  $T$ ), with the limit being a constant that depends on the user-defined parameters  $(m_0, \gamma)$  determining the sequence  $(\theta_m)_{m \in \mathbb{N}}$  in (2) (main text). Therefore, we have

$$\sum_{n=1}^T \mathbb{P}(\tau_I > n) \leq \mathcal{O}_T(1) + 2 \sum_{n=1}^T \sum_{m=\kappa n}^{(1-\kappa)n} \exp\left(\frac{-\theta_{\min(m, n-m)}^2}{2 \min(m, n-m)}\right). \quad (50)$$

To analyze the double-summation term, consider the following:

$$\begin{aligned} \sum_{m=\kappa n}^{(1-\kappa)n} \exp\left(\frac{-\theta_{\min(m, n-m)}^2}{2 \min(m, n-m)}\right) &\leq \sum_{m=\kappa n}^{n/2} \exp\left(\frac{-\theta_m^2}{2m}\right) + \sum_{m=n/2}^{(1-\kappa)n} \exp\left(\frac{-\theta_{n-m}^2}{2(n-m)}\right) \\ &\leq 2 \sum_{m=\kappa n}^{\infty} \exp\left(\frac{-\theta_m^2}{2m}\right) \\ &\leq 2 \sum_{m=\kappa n}^{\infty} \exp\left(\frac{-\theta_{m-m_0}^2}{2(m-m_0)}\right), \end{aligned} \quad (51)$$

Notice that

$$\frac{\theta_{m-m_0}^2}{2(m-m_0)} = \left(1 - \frac{m_0}{m}\right) (2 \log m + (\gamma/2) \log \log m) = 2 \log m + (\gamma/2) \log \log m + o_m(1), \quad (52)$$

where the last equality follows since  $m_0$  and  $\gamma$  are finite user-defined parameters. Using (51) and (52), we obtain

$$\begin{aligned} \sum_{m=\kappa n}^{(1-\kappa)n} \exp\left(\frac{-\theta_{\min(m, n-m)}^2}{2 \min(m, n-m)}\right) &\leq 2 \sum_{m=\kappa n}^{\infty} \exp(- (2 \log m + (\gamma/2) \log \log m + o_m(1))) \\ &= 2 \sum_{m=\kappa n}^{\infty} \frac{\mathcal{O}_m(1)}{m^2 (\log m)^{\gamma/2}} \\ &\leq \frac{1}{(\log n + \log \kappa)^{\gamma/2}} \sum_{m=\kappa n}^{\infty} \frac{\mathcal{O}_m(1)}{m^2} \\ &= \mathcal{O}_n \left( \frac{1}{(\log n + \log \kappa)^{\gamma/2}} \left( \frac{1}{\kappa n} + \frac{1}{\kappa^2 n^2} \right) \right). \end{aligned} \quad (53)$$

From (50) and (53), it follows that

$$\begin{aligned} \sum_{n=1}^T \mathbb{P}(\tau_I > n) &\leq \mathcal{O}_T(1) + \sum_{n=1}^T \mathcal{O}_n \left( \frac{1}{(\log n + \log \kappa)^{\gamma/2}} \left( \frac{1}{\kappa n} + \frac{1}{\kappa^2 n^2} \right) \right) \\ &= \mathcal{O}_T(1), \end{aligned}$$

where the conclusion in the last step follows since  $\gamma > 2$  is a finite user-defined parameter and  $\kappa \in (0, 1/2 - \sqrt{3}/4)$  is arbitrarily chosen. Therefore, the stated assertion that  $\mathbb{E}\tau_I < C_0$ , where  $C_0$  is some finite constant that depends on  $(m_0, \gamma)$ , follows.  $\square$

**Remark.** Part (i) of Theorem 4 has a significant bearing on this result. Specifically, if unlike UCB1, the playing rule does not satisfy a concentration property akin to the one stated in part (i) of Theorem 4, then the  $\mathcal{O}_T(1)$  term on the RHS in (50) would instead be  $\Omega(T)$ .

## References

- [1] AUER, P., CESA-BIANCHI, N., AND FISCHER, P. Finite-time analysis of the multiarmed bandit problem. *Machine learning* 47, 2-3 (2002), 235–256.
- [2] BESSON, L., AND KAUFMANN, E. What doubling tricks can and can't do for multi-armed bandits. *arXiv preprint arXiv:1803.06971* (2018).

- [3] GRIMMETT, G., GRIMMETT, G. R., STIRZAKER, D., ET AL. *Probability and random processes*. Oxford university press, 2001.
- [4] HOEFFDING, W. Probability inequalities for sums of bounded random variables. *Journal of the American Statistical Association* 58, 301 (1963), 13–30.
- [5] KHINTCHINE, A. über einen satz der wahrscheinlichkeitsrechnung. *Fundamenta Mathematicae* 6, 1 (1924), 9–20.
- [6] LAI, T. L., AND ROBBINS, H. Asymptotically efficient adaptive allocation rules. *Advances in applied mathematics* 6, 1 (1985), 4–22.
- [7] LATTIMORE, T., AND SZEPESVÁRI, C. Bandit algorithms.
